# Supplementary material for: Prevalence of Sedentary Behavior Among College Students in Guangdong Province, China: A Cross-Sectional Study
Source: Research Square preprint supplement (doi:10.21203/rs.3.rs-6465127/v1), 2025-05-22
Supplement: Supplementary file 1 [file d6e32173f1be6a0daa588ff5.docx]

Table 1 Characteristics of participants stratified by gender

| **Variable(%)** | **Total** | **Male** | **Female** |
| --- | --- | --- | --- |
| **Specialty** |  |  |  |
| Literature | 73(28.9) | 28(21.9) | 45(36.0) |
| Arts | 31(12.3) | 20(15.6) | 11(8.8) |
| Business and Economics | 43(17.0) | 18(14.1) | 25(20.0) |
| Medicine | 53(20.9) | 31(24.2) | 22(17.6) |
| Science and Engineering | 53(20.9) | 31(24.2) | 22(17.6) |
| **Grade** |  |  |  |
| Freshman | 65(25.7) | 32(25.0) | 33(26.4) |
| Sophomore | 68(26.9) | 38(29.7) | 30(24.0) |
| Junior | 60(23.7) | 21(16.4) | 39(31.2) |
| Senior | 48(19.0) | 28(21.9) | 20(16.0) |
| Fifth-year undergraduate | 12(4.7) | 9(7.0) | 3(2.4) |
| **Vacation residence** |  |  |  |
| Rural areas | 94(37.2) | 43(33.6) | 51(40.8) |
| urban areas | 159(62.8) | 85(66.4) | 74(59.2) |
| **Smoking status** |  |  |  |
| Smoker | 70(27.7) | 61(47.7) | 9(7.2) |
| Non-smoker | 183(72.3) | 67(52.3) | 116(92.8) |
| **Drinking status** |  |  |  |
| Drinker | 102(40.3) | 64(50.0) | 38(30.4) |
| Non-drinker | 151(59.7) | 64(50.0) | 87(69.6) |
| **BMI Categories** |  |  |  |
| underweight | 32(12.6) | 7(5.5) | 25(20.0) |
| normal weight | 154(60.9) | 76(59.4) | 78(62.4) |
| overweight | 57(22.5) | 40(31.3) | 17(13.6) |
| obese | 10(4.0) | 5(3.9) | 5(4.0) |

Table 2 Demographics by BMI categories and the analysis results

| **Characteristics** | **BMI categories** | | | | **𝜈** | **χ 2-value** |
| --- | --- | --- | --- | --- | --- | --- |
|  | **Underweight** | **Normal weight** | **Overweight** | **Obese** |
| **Gender** |  |  |  |  | 3 | **19.40***** |
| Male | 7 | 76 | 40 | 5 |  |  |
| Female | 25 | 78 | 17 | 5 |  |  |
| **Specialty** |  |  |  |  | 12 | 13.48 |
| Literature | 11 | 45 | 15 | 2 |  |  |
| Arts | 4 | 12 | 12 | 3 |  |  |
| Business and Economics | 5 | 31 | 6 | 1 |  |  |
| Medicine | 7 | 33 | 12 | 1 |  |  |
| Science and Engineering | 5 | 33 | 12 | 3 |  |  |
| **Grade** |  |  |  |  | 12 | 14.59 |
| Freshman | 10 | 38 | 15 | 2 |  |  |
| Sophomore | 4 | 41 | 17 | 6 |  |  |
| Junior | 8 | 38 | 12 | 2 |  |  |
| Senior | 10 | 28 | 10 | 0 |  |  |
| Fifth-year undergraduate | 0 | 9 | 3 | 0 |  |  |
| **Vacation residence** |  |  |  |  | 3 | 1.85 |
| Rural areas | 14 | 53 | 22 | 5 |  |  |
| urban areas | 18 | 101 | 35 | 5 |  |  |
| **Smoking status** |  |  |  |  | 3 | **11.44*** |
| Smoker | 4 | 38 | 23 | 5 |  |  |
| Non-smoker | 28 | 116 | 34 | 5 |  |  |
| **Drinking status** |  |  |  |  | 3 | 0.42 |
| Drinker | 13 | 60 | 25 | 4 |  |  |
| Non-drinker | 19 | 94 | 32 | 6 |  |  |

**P*<0.05, ****P*<0.001

Table 3 Sitting Time and Prevalence of Prolonged Sedentary Behavior (≥7 h/day) Stratified by Participant Characteristics

| **Characteristics** | **Total sitting time of SBQ(min/day)** | | **Average total sitting time of SBQ(min/day)** | **Sitting time≥ 7 h/day (%)** |
| --- | --- | --- | --- | --- |
|  | **Weekdays** | **Weekends** |
| **Gender** |  |  |  |  |
| Male | 10.90±4.78 | 11.77±5.50 | 11.15±4.42 | 78.13% |
| Female | 11.24±4.49 | 11.95±5.37 | 11.44±4.21 | 83.20% |
| **Specialty** |  |  |  |  |
| Literature | 11.48±4.80 | 11.60±5.00 | 11.51±4.34 | 83.56% |
| Arts | 11.03±4.21 | 11.40±6.44 | 11.14±4.27 | 83.87% |
| Business and Economics | 11.30±4.65 | 11.47±5.69 | 11.35±4.44 | 79.07% |
| Medicine | 10.38±5.03 | 12.74±5.19 | 11.06±4.58 | 71.70% |
| Science and Engineering | 11.02±4.27 | 11.91±5.47 | 11.27±4.06 | 84.91% |
| **Grade** |  |  |  |  |
| Freshman | 11.25±4.58 | 12.05±5.93 | 11.48±4.41 | 80.00% |
| Sophomore | 11.71±4.21 | 13.57±4.97 | 12.24±3.81 | 86.76% |
| Junior | 10.91±4.34 | 10.63±5.24 | 10.83±4.00 | 85.00% |
| Senior | 11.31±4.58 | 11.39±5.35 | 11.27±4.82 | 79.17% |
| Fifth-year undergraduate | 6.40±4.73 | 9.15±6.02 | 7.18±4.80 | 33.34% |
| **Vacation residence** |  |  |  |  |
| Rural areas | 9.76±4.75 | 11.04±5.24 | 10.12±4.37 | 71.27% |
| urban areas | 11.84±4.40 | 12.34±5.49 | 11.99±0.35 | 86.16% |
| **Smoking status** |  |  |  |  |
| Smoker | 10.65±4.50 | 10.75±4.54 | 10.98±6.38 | 75.71% |
| Non-smoker | 11.23±4.68 | 12.20±4.99 | 11.50±4.21 | 82.51% |
| **Drinking status** |  |  |  |  |
| Drinker | 10.79±4.70 | 11.42±5.55 | 10.97±4.33 | 80.39% |
| Non-drinker | 11.25±4.59 | 12.16±5.34 | 11.52±4.30 | 80.79% |

Table 4 Total Sitting Time Stratified by Participant Characteristics

| **Characteristics** | **Total sitting time** | **t/F** | **Post-hoc test（LSD）** |
| --- | --- | --- | --- |
| **Gender** |  | 0.54 | / |
| Male | 11.15±4.42 |  |  |
| Female | 11.44±4.21 |  |  |
| **Specialty** |  | 0.10 | / |
| Literature | 11.51±4.34 |  |  |
| Arts | 11.14±4.27 |  |  |
| Business and Economics | 11.35±4.44 |  |  |
| Medicine | 11.06±4.58 |  |  |
| Science and Engineering | 11.27±4.06 |  |  |
| **Grade** |  | **3.93**** | Grade 5<Grade 1-4 (P<0.01) |
| Freshman | 11.48±4.41 |  |  |
| Sophomore | 12.24±3.81 |  |  |
| Junior | 10.83±4.00 |  |  |
| Senior | 11.27±4.82 |  |  |
| Fifth-year undergraduate | 7.18±4.80 |  |  |
| **Vacation residence** |  | **-3.39**** | / |
| Rural areas | 10.12±4.37 |  |  |
| urban areas | 11.99±0.35 |  |  |
| **Smoking status** |  | -1.25 | / |
| Smoker | 10.98±6.38 |  |  |
| Non-smoker | 11.50±4.21 |  |  |
| **Drinking status** |  | -0.98 | / |
| Drinker | 10.97±4.33 |  |  |
| Non-drinker | 11.52±4.30 |  |  |

***P*<0.01

Table 5 Weekday Sitting Time Stratified by Participant Characteristics

| **Characteristics** | **Weekday Sitting Time** | **t/F** | **Post-hoc test** |
| --- | --- | --- | --- |
| **Gender** |  | 0.58 | / |
| Male | 10.90±4.78 |  |  |
| Female | 11.24±4.49 |  |  |
| **Specialty** |  | 0.46 | / |
| Literature | 11.48±4.80 |  |  |
| Arts | 11.03±4.21 |  |  |
| Business and Economics | 11.30±4.65 |  |  |
| Medicine | 10.38±5.03 |  |  |
| Science and Engineering | 11.02±4.27 |  |  |
| **Grade** |  | **3.593**** | Grade 5<Grade 1-4 (P<0.01) |
| Freshman | 11.25±4.58 |  |  |
| Sophomore | 11.71±4.21 |  |  |
| Junior | 10.91±4.34 |  |  |
| Senior | 11.31±4.58 |  |  |
| Fifth-year undergraduate | 6.40±4.73 |  |  |
| **Vacation residence** |  | **-3.55***** | / |
| Rural areas | 9.76±4.75 |  |  |
| urban areas | 11.84±4.40 |  |  |
| **Smoking status** |  | -0.88 | / |
| Smoker | 10.65±4.50 |  |  |
| Non-smoker | 11.23±4.68 |  |  |
| **Drinking status** |  | -0.78 | / |
| Drinker | 10.79±4.70 |  |  |
| Non-drinker | 11.25±4.59 |  |  |

***P*<0.01, ****P*<0.001

Table 3-6 Weekend Sitting Time **Stratified by Participant Characteristics**

| **Characteristics** | **Weekend Sitting Time** | **t/F** | **Post-hoc test** |
| --- | --- | --- | --- |
| **Gender** |  | 0.28 | / |
| Male | 11.77±5.50 |  |  |
| Female | 11.95±5.37 |  |  |
| **Specialty** |  | 0.51 | / |
| Literature | 11.60±5.00 |  |  |
| Arts | 11.40±6.44 |  |  |
| Business and Economics | 11.47±5.69 |  |  |
| Medicine | 12.74±5.19 |  |  |
| Science and Engineering | 11.91±5.47 |  |  |
| **Grade** |  | **3.46**** | Grade 2>Grade 3-5 (*P*<0.05) |
| Freshman | 12.05±5.93 |  |  |
| Sophomore | 13.57±4.97 |  |  |
| Junior | 10.63±5.24 |  |  |
| Senior | 11.39±5.35 |  |  |
| Fifth-year undergraduate | 9.15±6.02 |  |  |
| **Vacation residence** |  | -1.86 | / |
| Rural areas | 11.04±5.24 |  |  |
| urban areas | 12.34±5.49 |  |  |
| **Smoking status** |  | -1.61 | / |
| Smoker | 10.75±4.54 |  |  |
| Non-smoker | 12.20±4.99 |  |  |
| **Drinking status** |  | -1.07 | / |
| Drinker | 11.42±5.55 |  |  |
| Non-drinker | 12.16±5.34 |  |  |

***P*<0.01
